# Supplementary material for: How do environment-dependent switching rates between susceptible and persister cells affect the dynamics of biofilms faced with antibiotics?
Source: PubMed Central journal article supplement (PMC5854711; doi:10.1038/s41522-018-0049-2), 2018-03-15
Supplement: 41522_2018_49_MOESM1_ESM.pdf [file 41522_2018_49_MOESM1_ESM.pdf]

# How do environment-dependent switching rates between susceptible and persister cells affect the dynamics of biofilms faced with antibiotics?

Gabriel Carvalho<sup>1\*</sup>, Damien Balestrino<sup>2</sup>, Christiane Forestier<sup>2</sup>, Jean-Denis Mathias<sup>1</sup>

<sup>1</sup>UR LISC Laboratoire d'Ingénierie pour les Systèmes Complexes, Irstea, Aubière, France

<sup>2</sup>LMGE, UMR6023 CNRS, Université Clermont Auvergne, Clermont-Ferrand, France

\*Correspondence: IRSTEA, Laboratoire d'Ingénierie pour les Systèmes Complexes, 9 avenue Blaise Pascal, CS 20085, 63178 Aubière, France  
jean-denis.mathias@irstea.fr; tel: +33 4 73 44 06 80; fax: +33 4 73 44 06 96

## 1. Computational domain

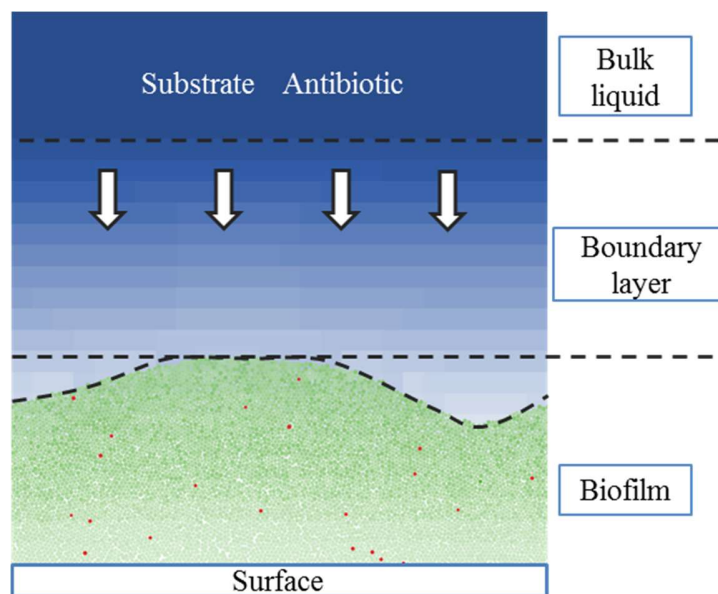

**Figure S 1: Scheme of the spatial organization of the computational domain.** The model is in two spatial dimensions, width and height. Solutes diffuse from a bulk liquid above the biofilm through a boundary layer. Actively growing susceptible cells can become non-growing persisters or dead cells. Persister can switch back to susceptible cells or become dead. Substrate concentration is represented by a shade of blue. Susceptible cells are represented by a shade of green, depending on their growth rate.

## 2. Model parameters

**Table S1: Model default parameters.**

| Symbol                      | Units                         | Value                | Description                                                                                                                                                                   | Reference    |
|-----------------------------|-------------------------------|----------------------|-------------------------------------------------------------------------------------------------------------------------------------------------------------------------------|--------------|
| <b>Computational domain</b> |                               |                      |                                                                                                                                                                               |              |
| $lx$                        | $\mu\text{m}$                 | 104                  | Width of the domain                                                                                                                                                           | This study   |
| $\Delta l$                  | $\mu\text{m}$                 | 4                    | Length of a grid cell (square)                                                                                                                                                | This study   |
| $lb$                        | $\mu\text{m}$                 | 40                   | Length of the boundary layer                                                                                                                                                  | <sup>1</sup> |
| $\Delta t_{dif}$            | ms                            | 3.5                  | Time step of the diffusion-reaction algorithm                                                                                                                                 | This study   |
| $\Delta t_{cell}$           | s                             | 60                   | Time step of cell update                                                                                                                                                      | This study   |
| <b>Solutes</b>              |                               |                      |                                                                                                                                                                               |              |
| $C_{S,bulk}$                | $\text{g.L}^{-1}$             | 0.4                  | Substrate concentration in the bulk                                                                                                                                           | This study   |
| $D_S$                       | $\mu\text{m}^2.\text{s}^{-1}$ | 900                  | Diffusion coefficient of the substrate (glucose) in water at 37°C                                                                                                             | <sup>2</sup> |
| $C_{A,bulk}$                | xMIC                          | 1000                 | Bulk concentration of antibiotic during treatments                                                                                                                            | This study   |
| $C_{A,MIC}$                 | $\text{mg.L}^{-1}$            | 0.05                 | Minimal Inhibitory Concentration of the antibiotic                                                                                                                            | <sup>3</sup> |
| $D_A$                       | $\mu\text{m}^2.\text{s}^{-1}$ | 900                  | Diffusion coefficient of the antibiotic in water at 37°C                                                                                                                      | This study   |
| $D_n^b/D_n$                 |                               | 0.8                  | Relative diffusion coefficient of a solute $n$ (substrate $S$ or antibiotic $A$ ) in the biofilm compared to its coefficient in water ( $D_S^b=0.8*D_S$ and $D_A^b=0.8*D_A$ ) | <sup>1</sup> |
| <b>Bacterial growth</b>     |                               |                      |                                                                                                                                                                               |              |
| $\mu_{max}$                 | $\text{h}^{-1}$               | 1.25                 | Maximal growth rate                                                                                                                                                           | <sup>3</sup> |
| $K_s$                       | $\text{g.L}^{-1}$             | $3.5 \times 10^{-5}$ | Half-saturation constant for the substrate $S$ ( $\mu = \mu_{max}/2$ for $C_S = K_s$ )                                                                                        | <sup>3</sup> |
| $Y_{XS}$                    | $\text{fg.cell}^{-1}$         | 1187                 | Substrate consumed to produce one cell                                                                                                                                        | <sup>3</sup> |
| $d_X$                       | $\text{fg.}\mu\text{m}^{-3}$  | 200                  | Density of cells                                                                                                                                                              | <sup>4</sup> |
| $m_{div}$                   | fg                            | 500                  | Cell mass at division                                                                                                                                                         | <sup>4</sup> |
| $k_{max}$                   | $\text{h}^{-1}$               | 10                   | Maximum killing rate of normal cells                                                                                                                                          | This study   |
| $k_{maxp}$                  | $\text{h}^{-1}$               | 0.1                  | Maximum killing rate of persisters                                                                                                                                            | This study   |
| $K_k$                       | $\text{g.L}^{-1}$             | 6.4                  | Half-saturation constant for the killing rates of susceptible and persister cells ( $k(MIC) = \mu_{max}$ )                                                                    | This study   |
| $L_{DS}$                    | $\text{h}^{-1}$               | 0.05                 | Lysis rate of dead cells                                                                                                                                                      | This study   |

### 3. Diffusion-reaction algorithm

To be solved, the diffusion-reaction equation is discretized in time and space. The equation used in the model is:

$$C_n^{t+\Delta t_{diff}}(x,y) = C_n^t(x,y) + \frac{\Delta t_{diff}}{\Delta l^2} \left[ \begin{aligned} &D_n(x-1,y) \times C_n^t(x-1,y) + D_n(x+1,y) \times C_n^t(x+1,y) \\ &+ D_n(x,y-1) \times C_n^t(x,y-1) + D_n(x,y+1) \times C_n^t(x,y+1) - N \times D_n(x,y) \times C_n^t(x,y) \end{aligned} \right] + r_n(x,y) \times \Delta t_{diff}$$

$\Delta t_{diff}$  is the time step. The space is discretized in square shaped grid cells of length  $\Delta l$ .  $C_n^t(x,y)$  is the concentration of the component  $n$  in the patch  $(x, y)$  at an instant  $t$ .  $N$  is the number of neighbors of the grid cell  $(x, y)$ .  $D_n(x,y)$  is the diffusion coefficient of the component  $n$  in the grid cell  $(x,y)$ .  $r_n(x,y)$  is the set of reactions occurring in the grid cell  $(x, y)$  for the component  $n$ .

### 4. Relation between the number of persisters and $b$ post-treatment and the recovery efficiency

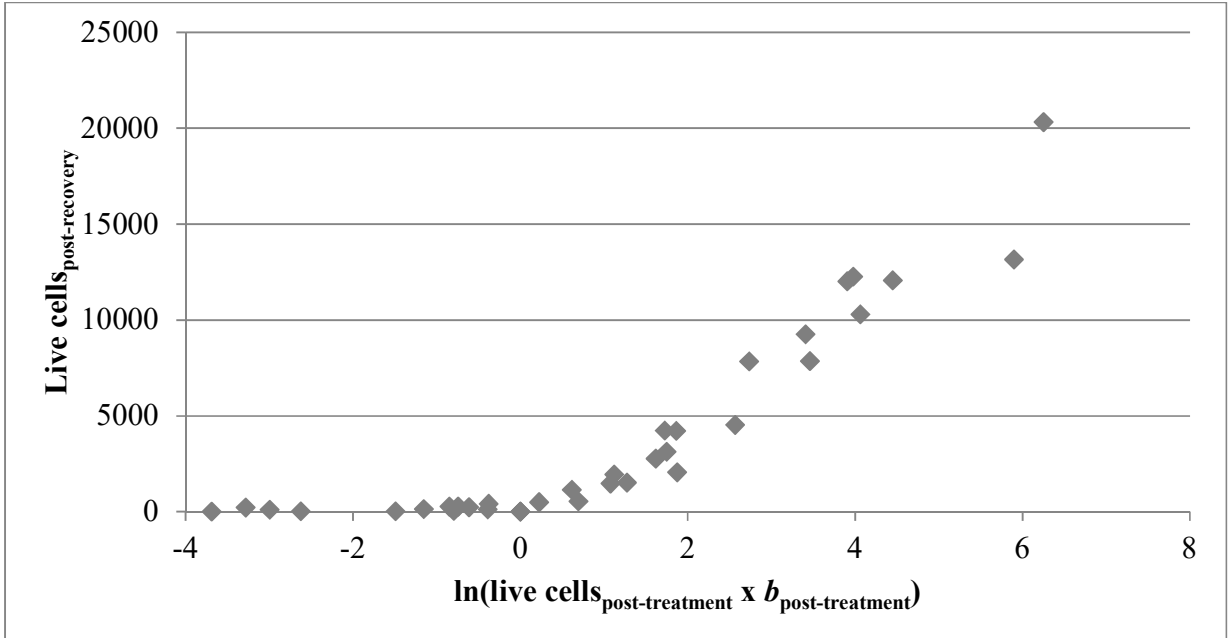

**Figure S2: Correlations.** Live cells post-recovery depends on the number of live cells post-treatment (only persisters) and the post-treatment wake up rate  $b$  when the switching strategy does not impair growth (substrate-dependent and antibiotic-dependent strategies). The  $x$  axis represents the natural logarithm of live cells post-treatment (i.e. the persisters which survived) multiplied by  $b_{max}$ . The results plotted are the mean of four simulations with the substrate or antibiotic-dependent strategies.

## 5. Population dynamics

### 5.1 Constant switches

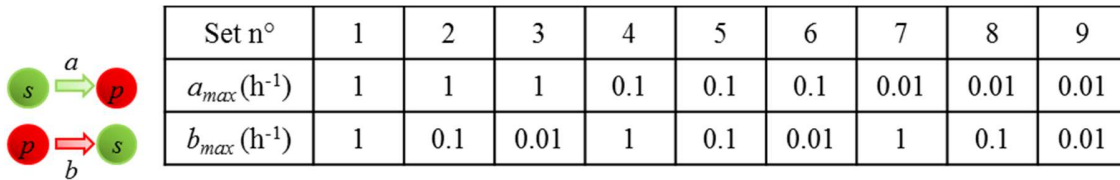

#### 5.1.1 2 hours treatment

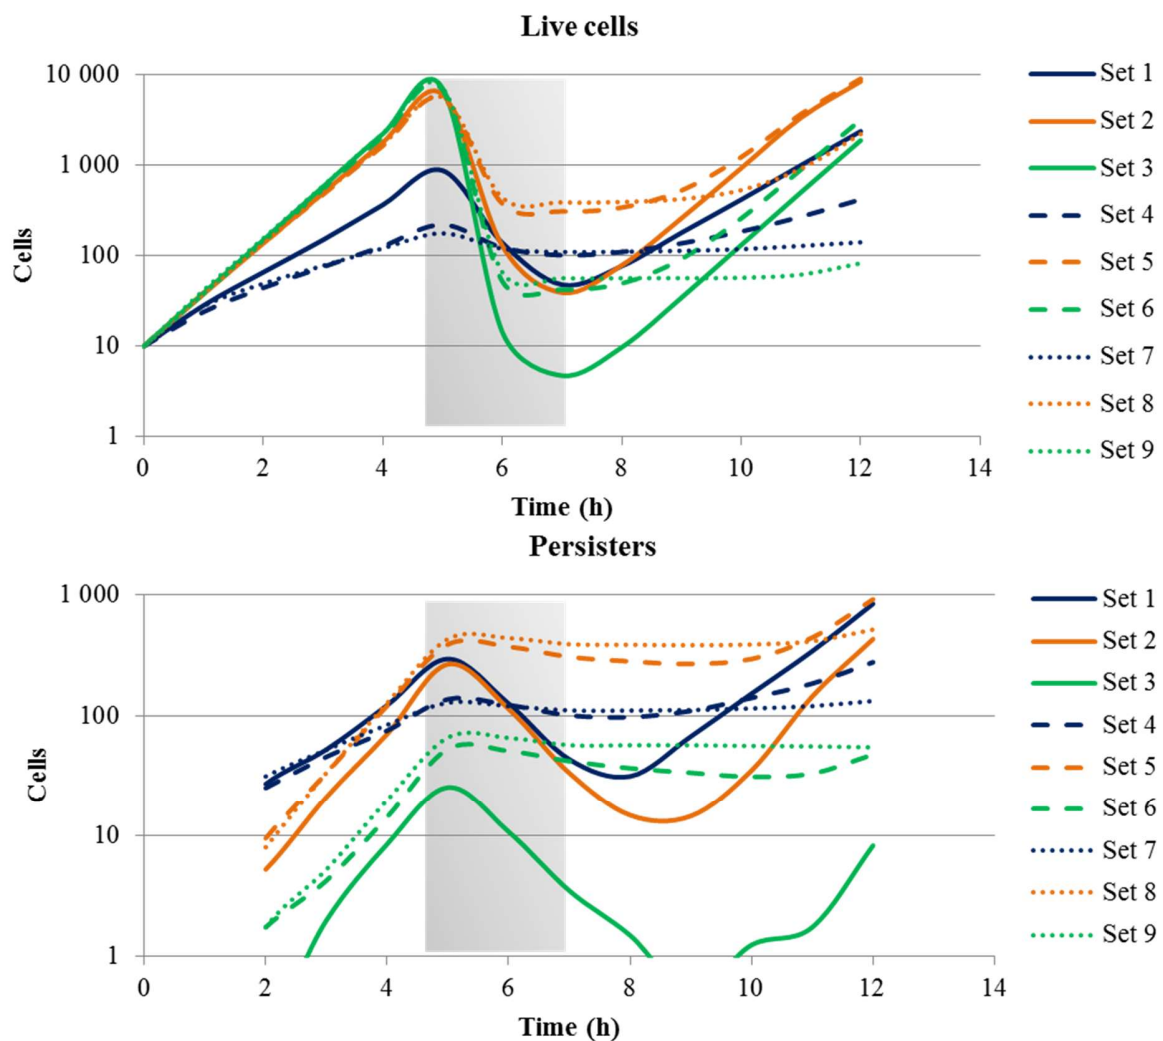

**Figure S 3: Population dynamics** of live cells (susceptible and persister cells) and persister cells only with constant switches, two hours treatment (means of four simulations). The shaded grey area represents the antibiotic treatment.

## 5.1.2 8 hours treatment

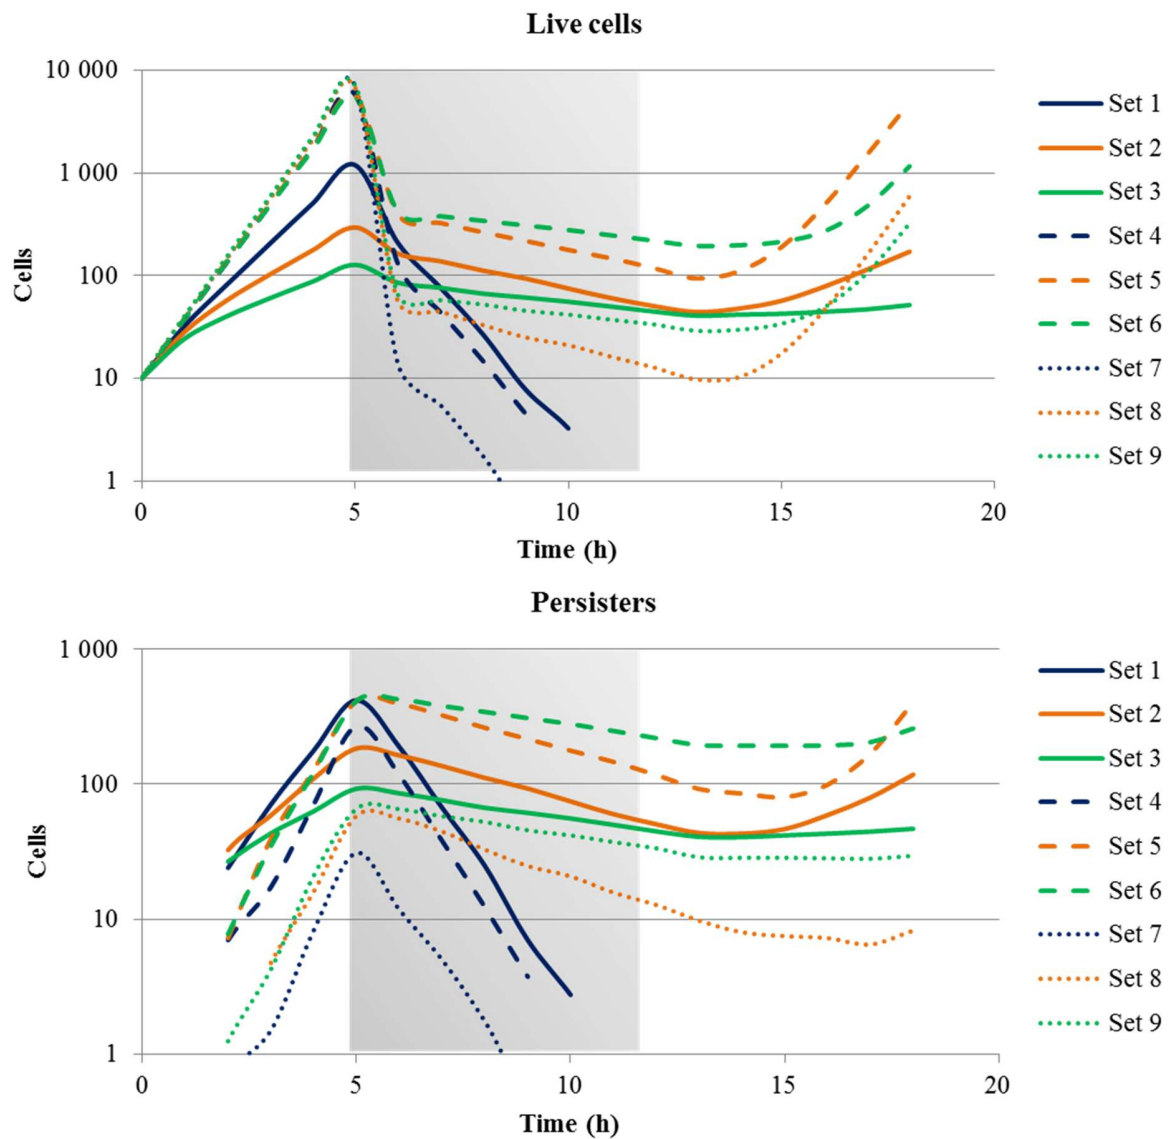

**Figure S 4: Population dynamics** of live cells (susceptible and persister cells) and persister cells only with constant switches, eight hours treatment (means of four simulations). The shaded grey area represents the antibiotic treatment.

## 5.2 Substrate-dependent switches

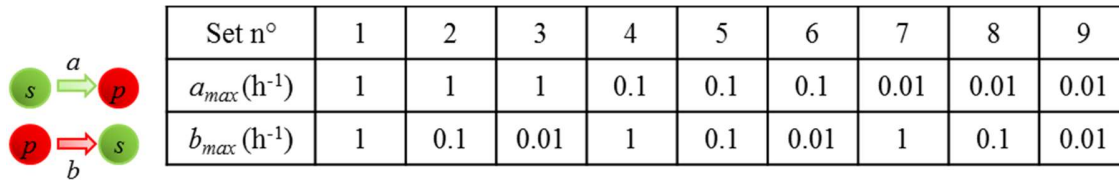

### 5.2.1 2 hours treatment

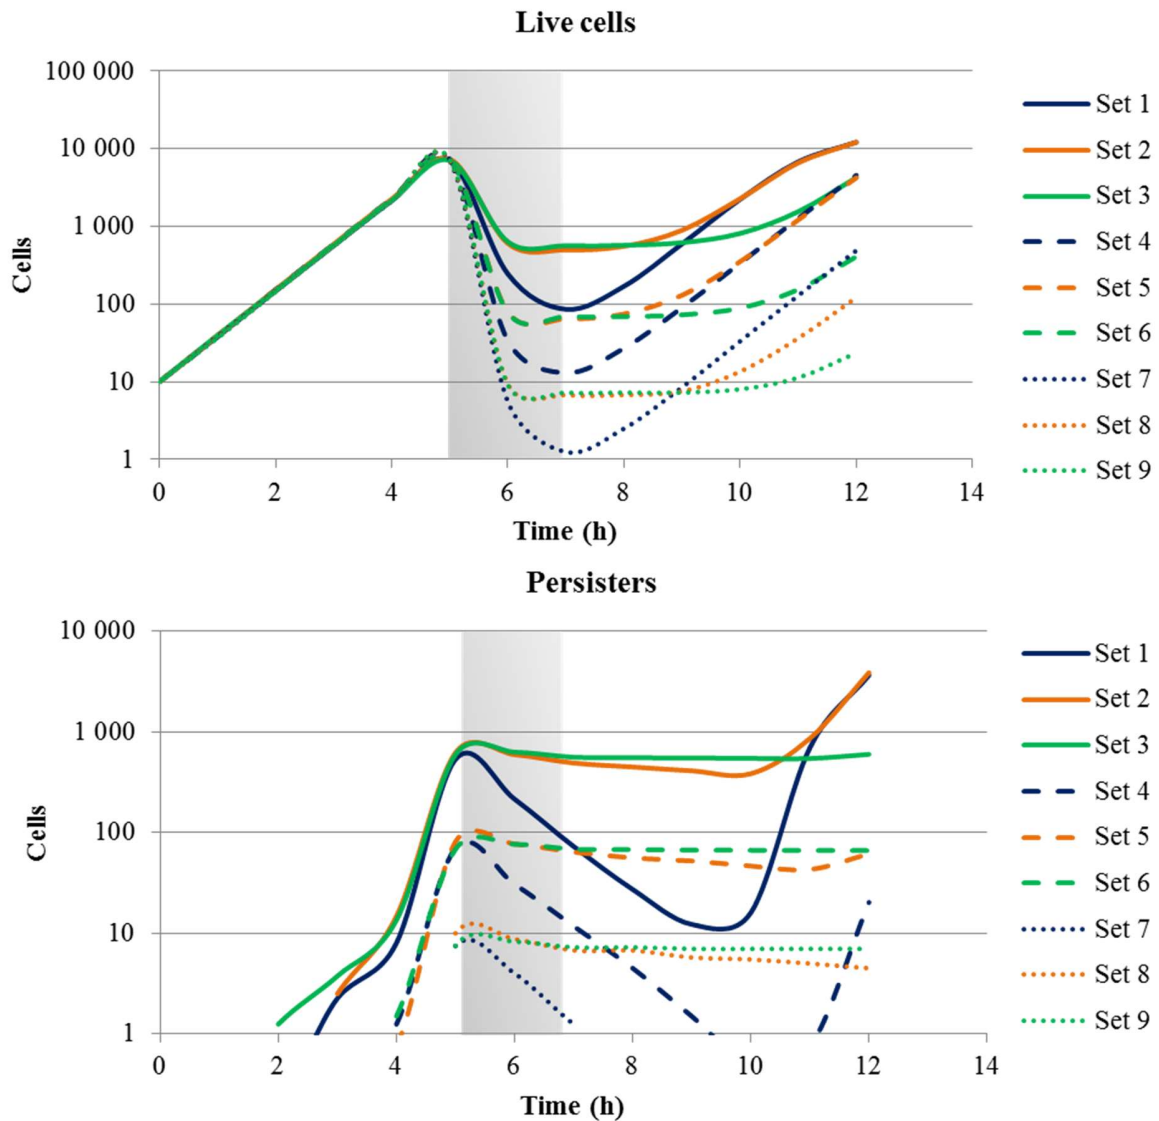

**Figure S 5: Population dynamics** of live cells (susceptible and persister cells) and persister cells only with substrate-dependent switches, two hours treatment (means of four simulations). The shaded grey area represents the antibiotic treatment.

## 5.2.2 8 hours treatment

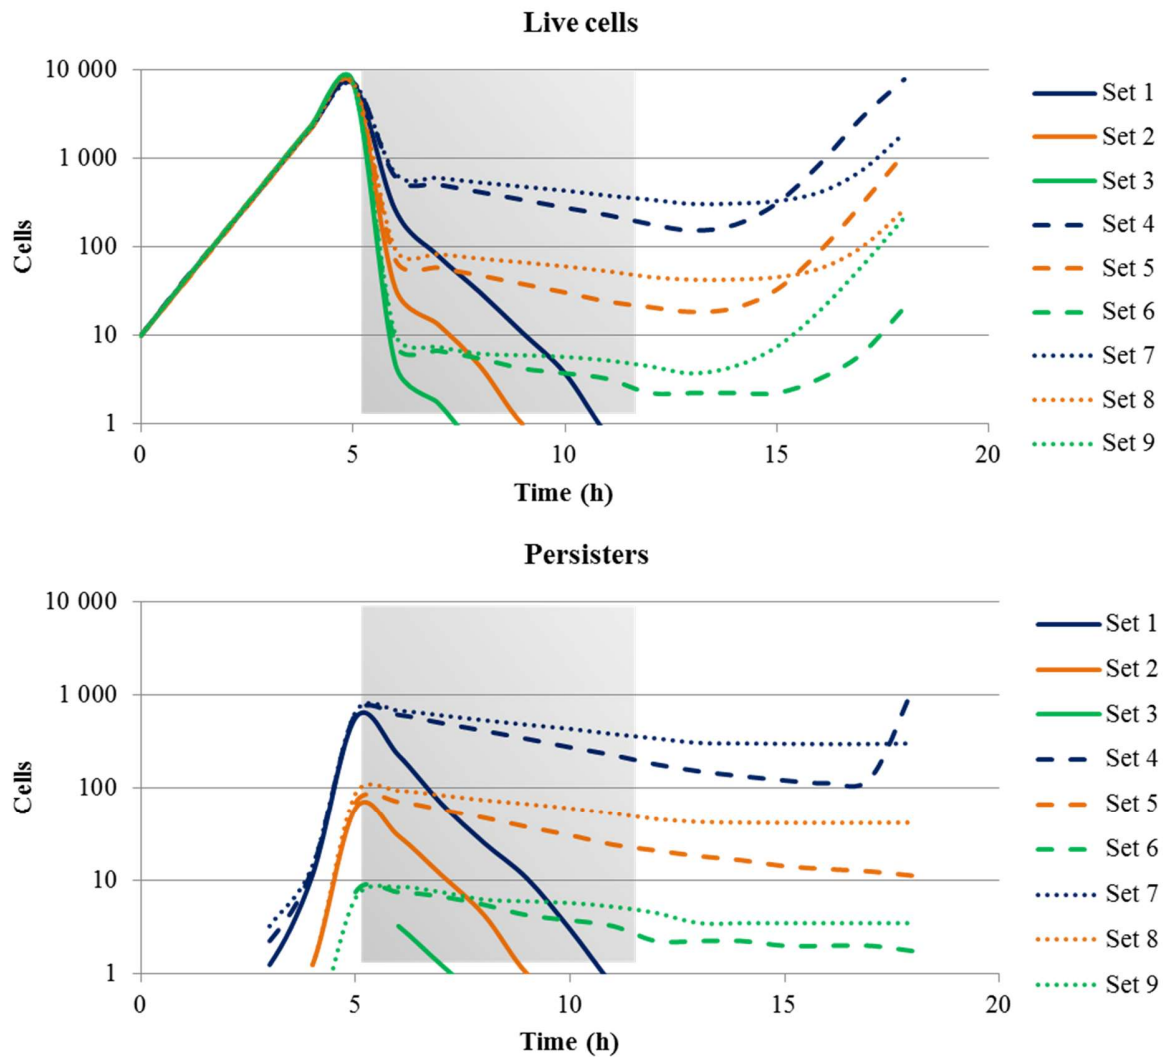

**Figure S 6: Population dynamics** of live cells (susceptible and persister cells) and persister cells only with substrate-dependent switches, eight hours treatment (means of four simulations). The shaded grey area represents the antibiotic treatment.

### 5.3 Antibiotic-dependent switches

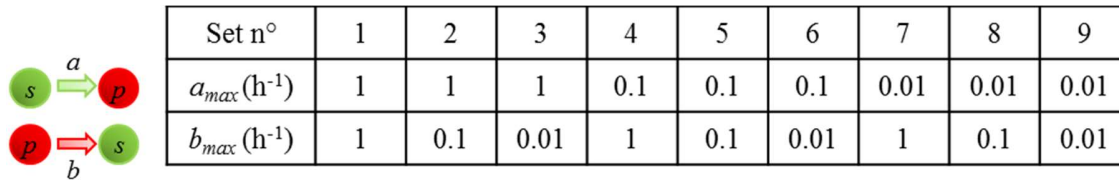

#### 5.3.1 2 hours treatment

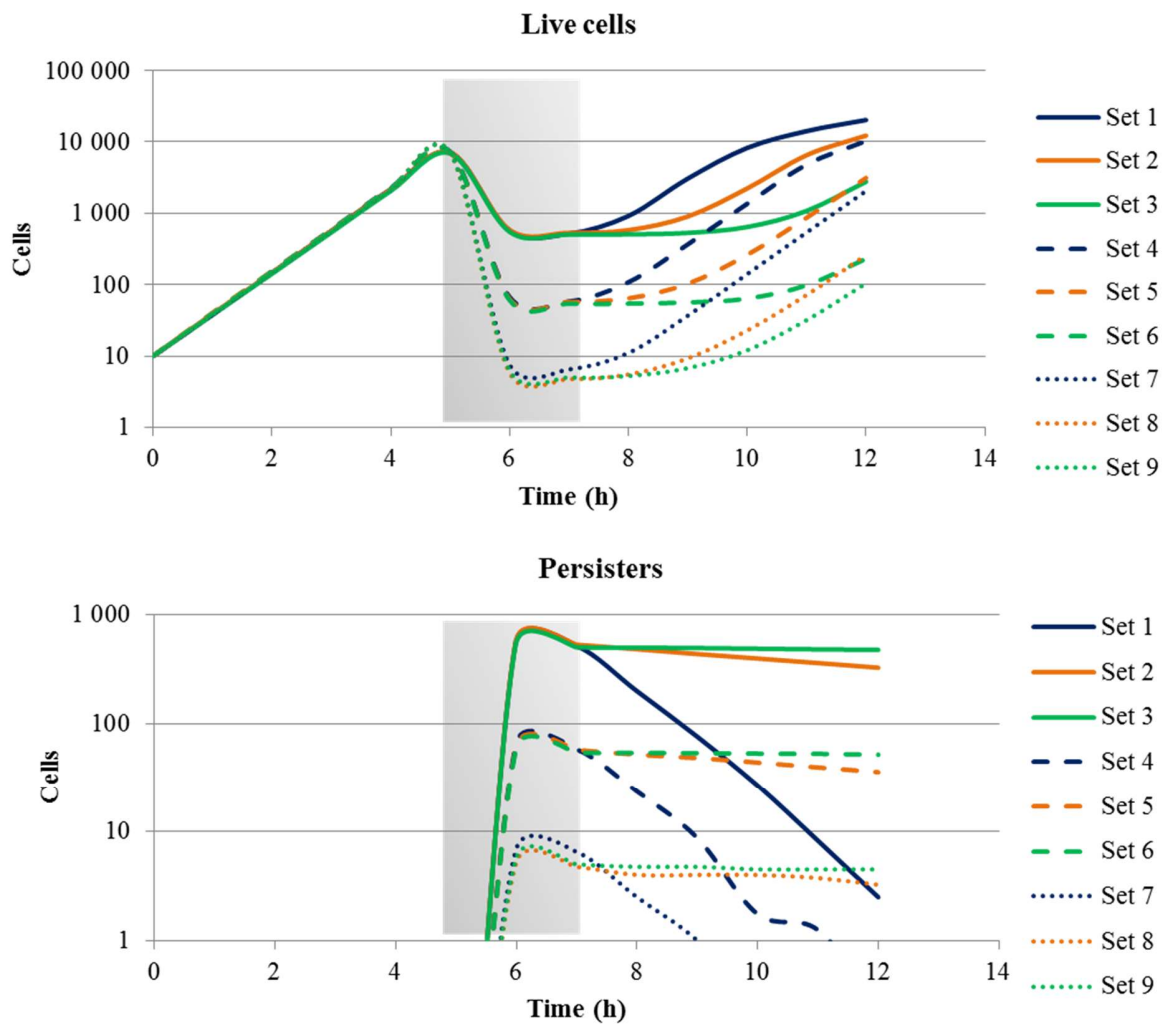

**Figure S 7: Population dynamics** of live cells (susceptible and persister cells) and persister cells only with antibiotic-dependent switches, two hours treatment (means of four simulations). The shaded grey area represents the antibiotic treatment.



## 5.3.2 8 hours treatment

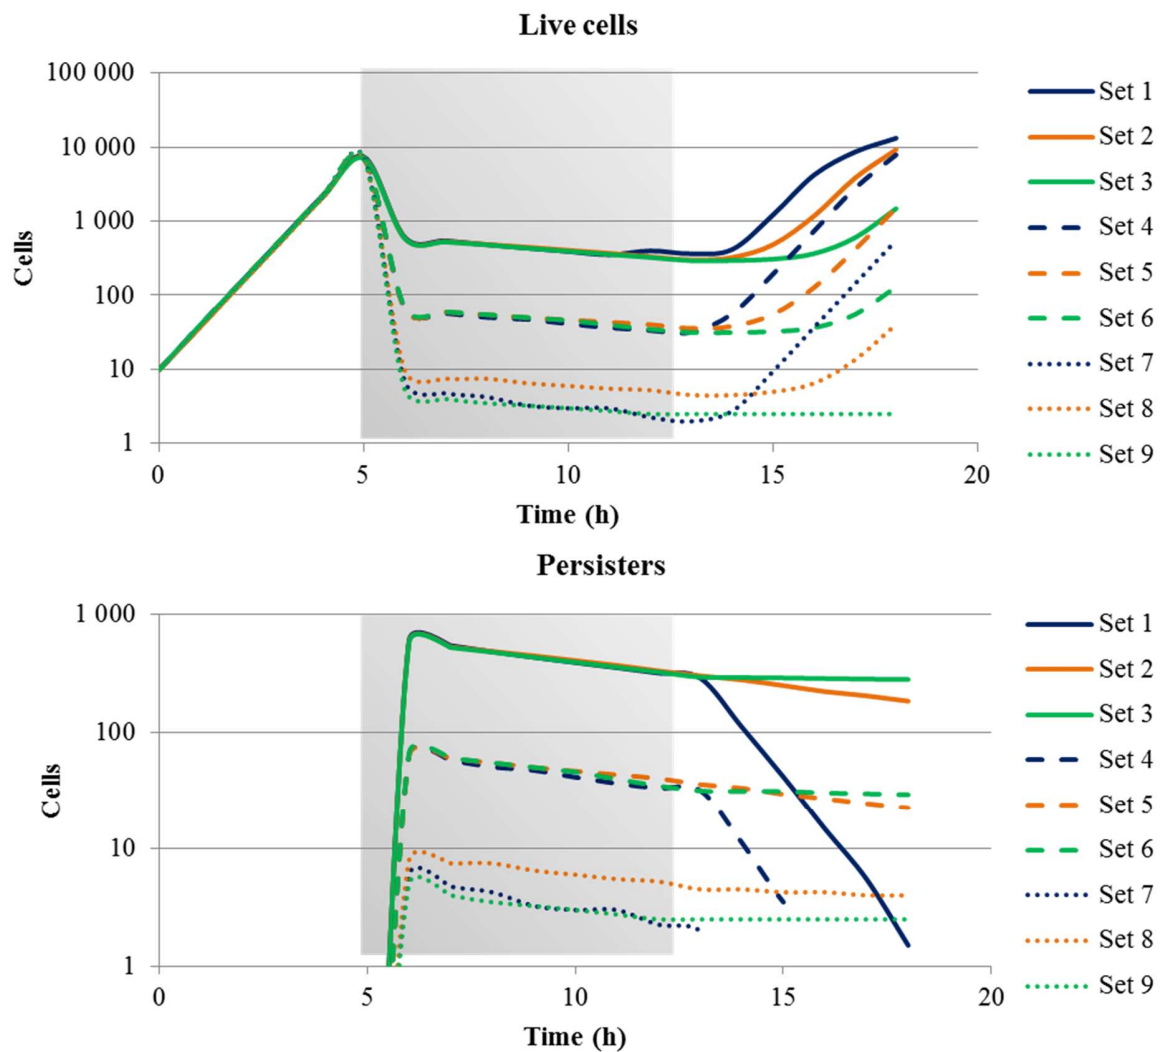

**Figure S 8: Population dynamics** of live cells (susceptible and persister cells) and persister cells only with antibiotic-dependent switches, eight hours treatment (means of four simulations). The shaded grey area represents the antibiotic treatment.

## 6. Images of recovered biofilms (5 hours post treatment)

### 6.1 Constant switches

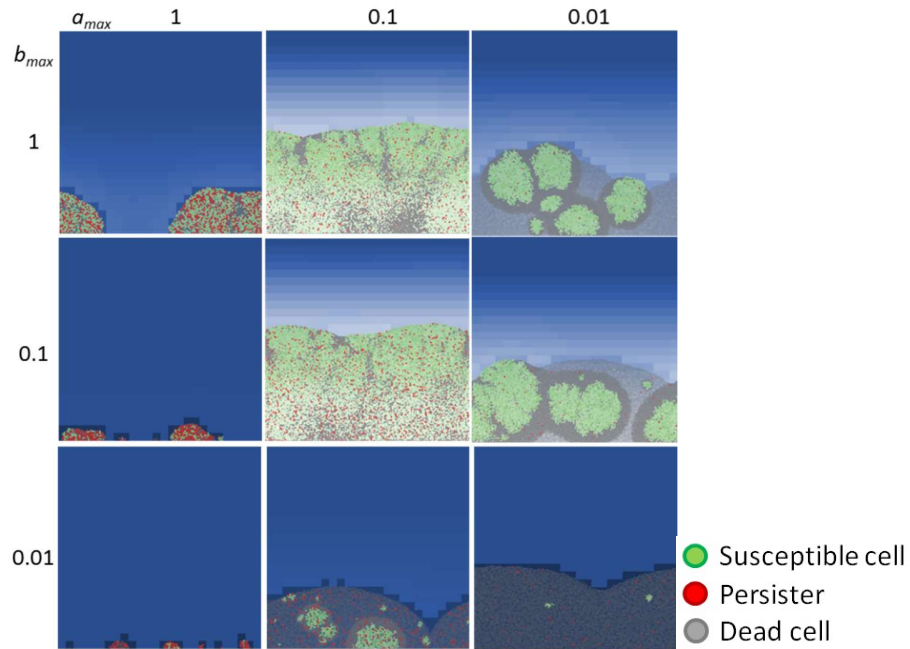

**Figure S 9:** Biofilms initially treated during two hours, constant switches.

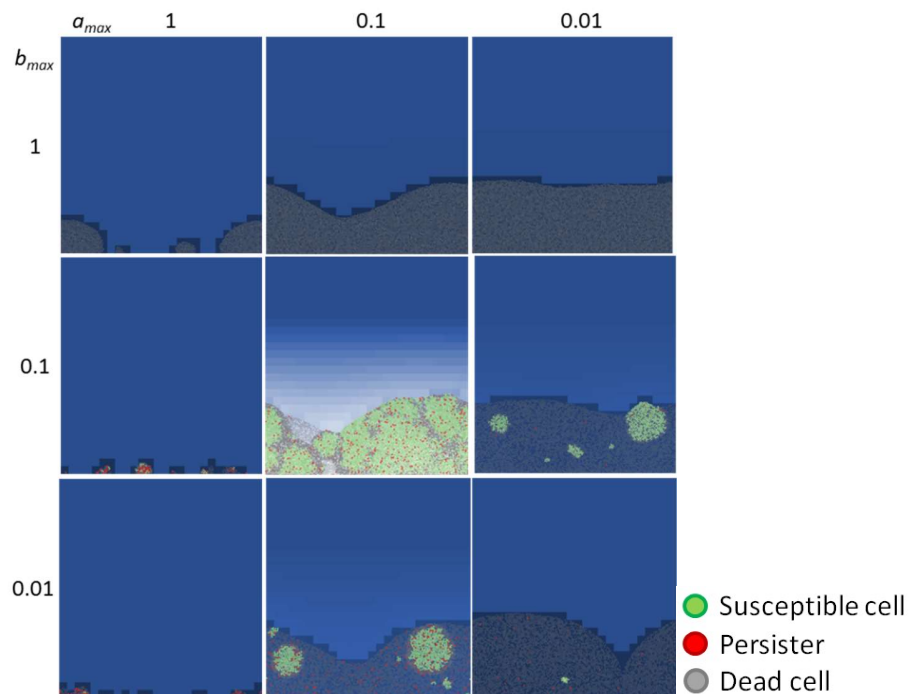

**Figure S 10:** Biofilms initially treated during eight hours, constant switches.

## 6.2 Substrate-dependent switches

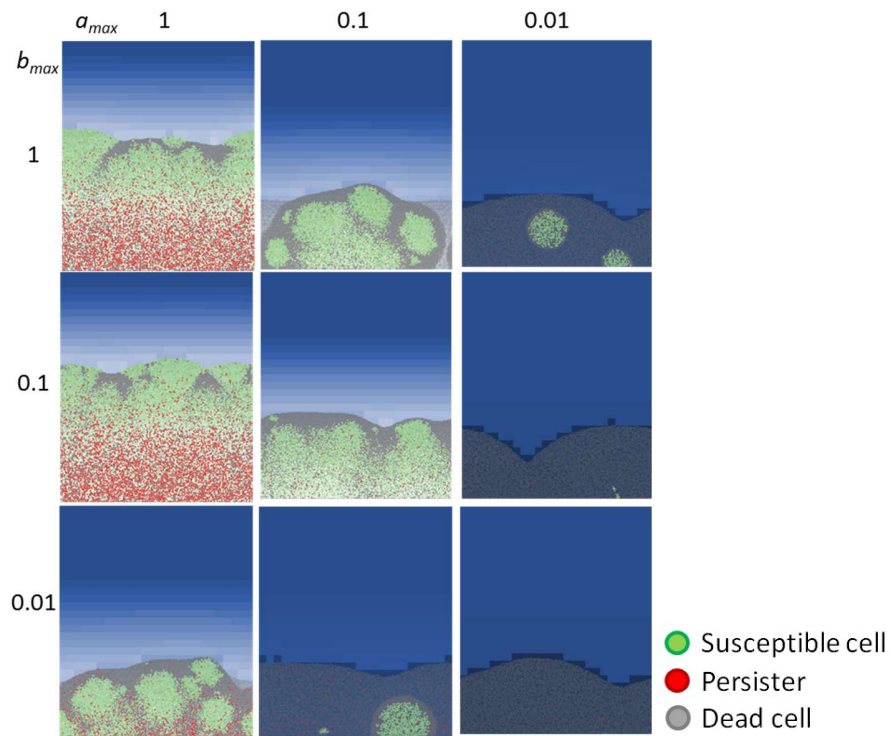

**Figure S 11:** Biofilms initially treated during two hours, substrate-dependent switches.

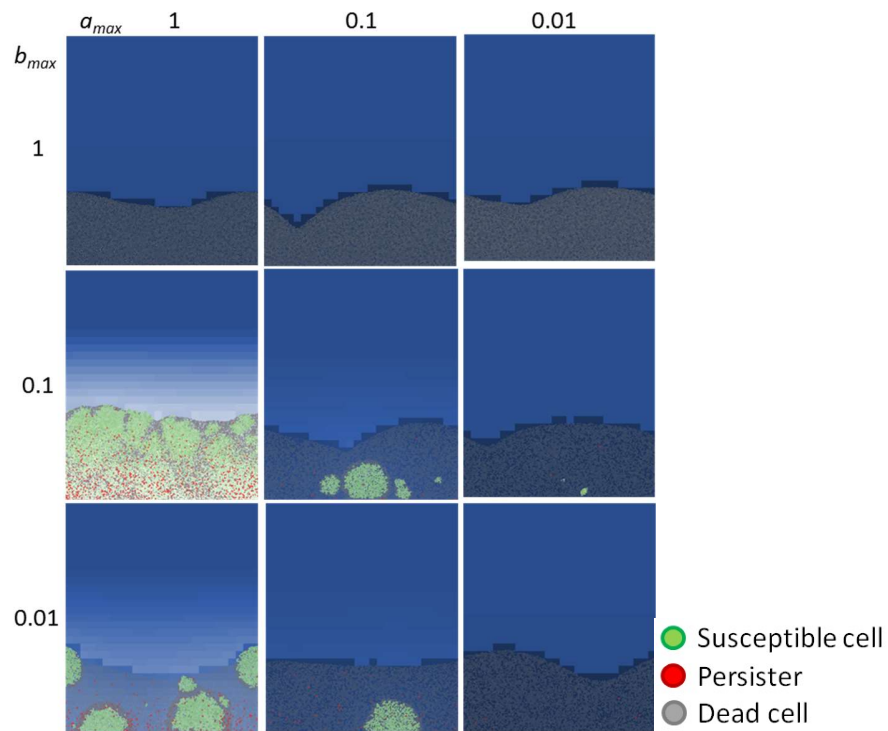

**Figure S 12:** Biofilms initially treated during eight hours, substrate-dependent switches.

### 6.3 Antibiotic-dependent switches

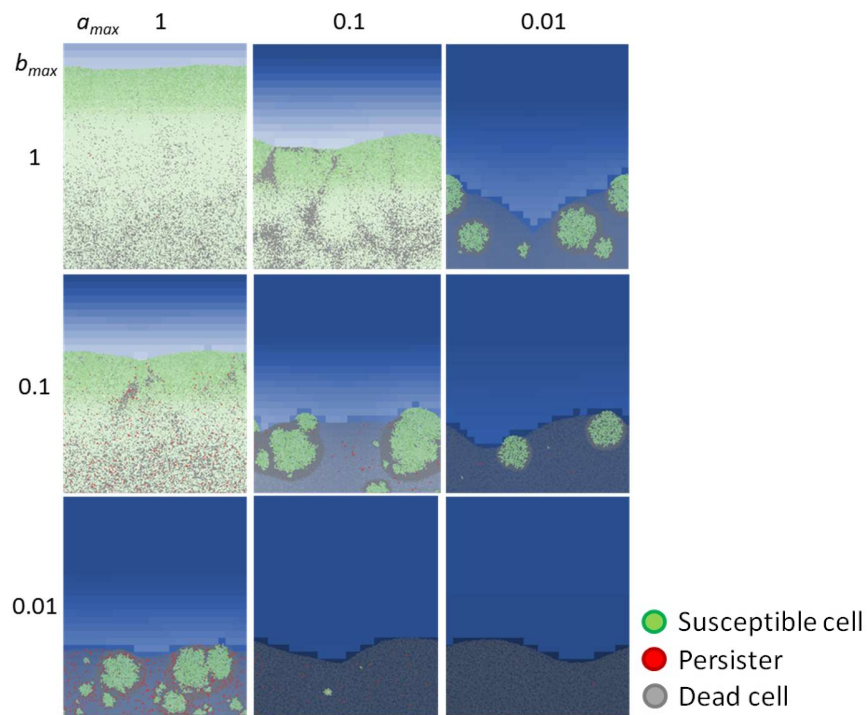

**Figure S 13:** Biofilms initially treated during two hours, antibiotic-dependent switches.

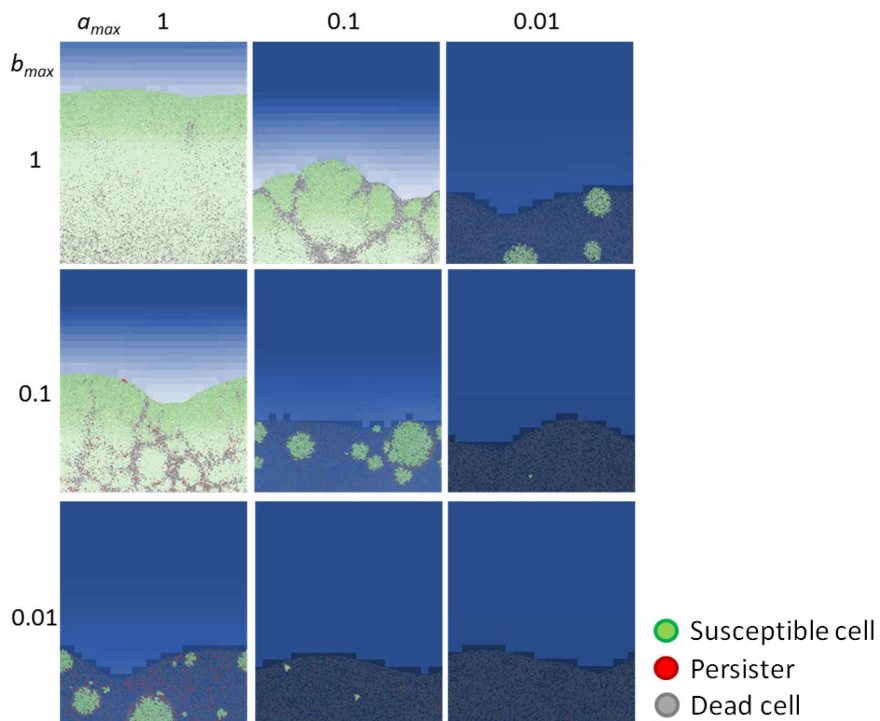

**Figure S 14:** Biofilms initially treated during eight hours, antibiotic-dependent switches.

### 7. Local sensibility analysis

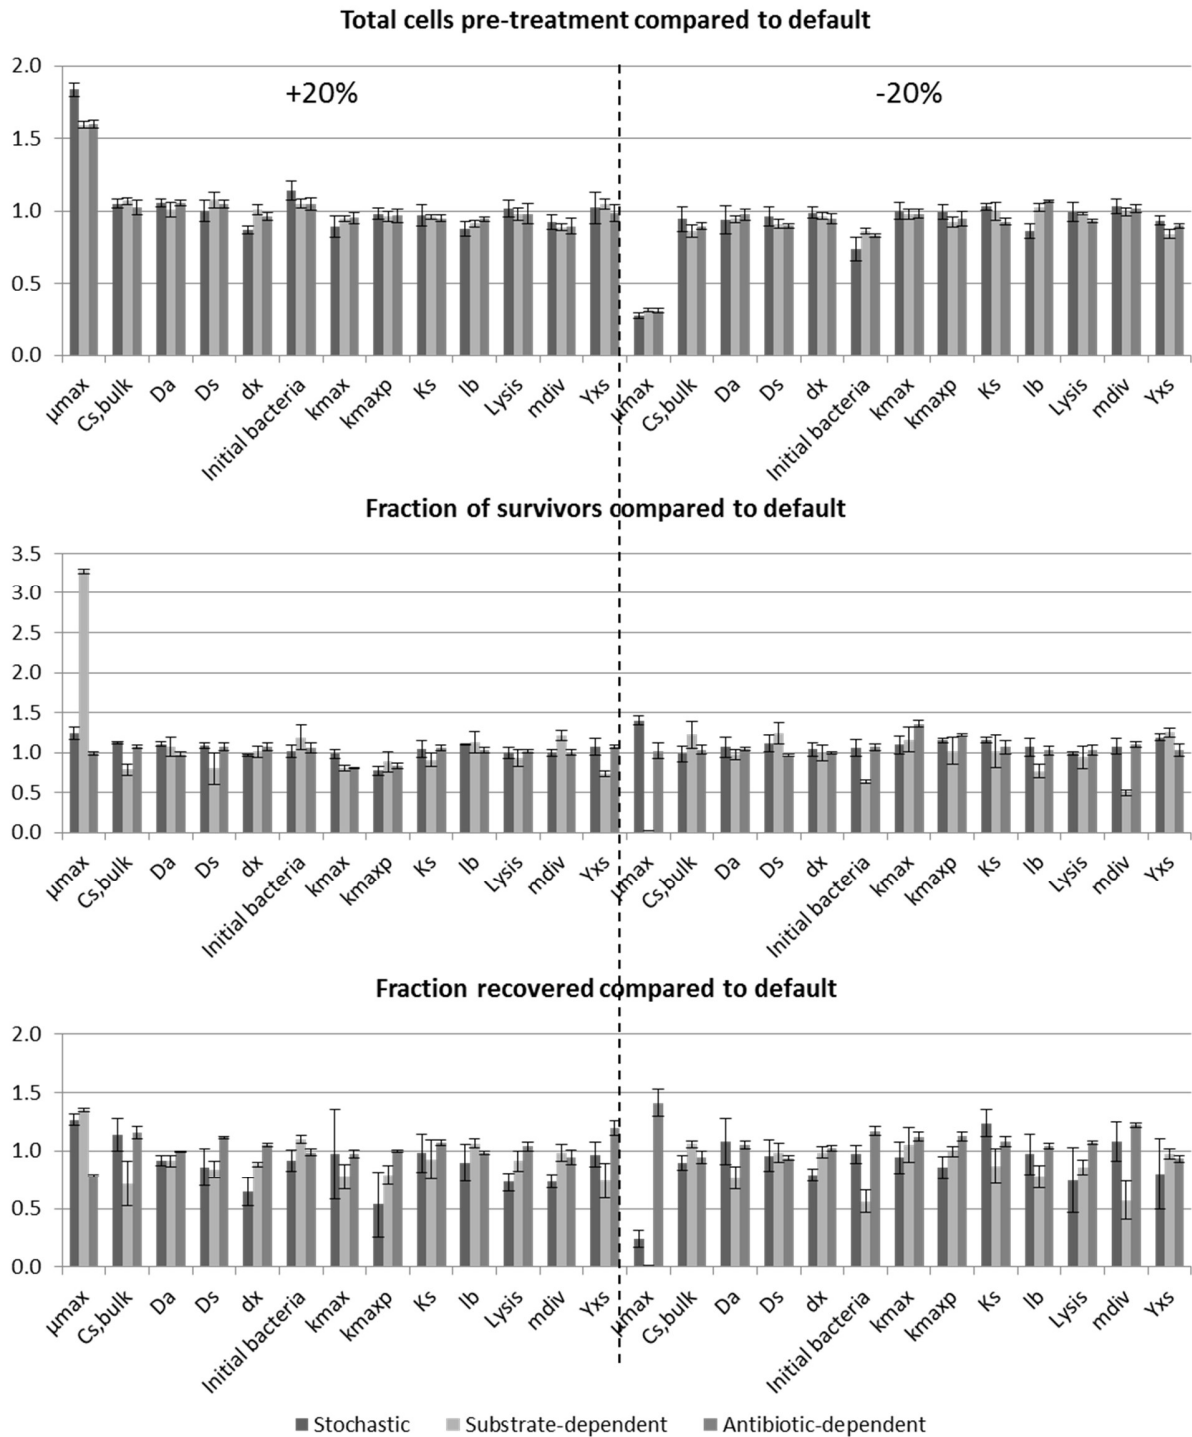

**Figure S 15:** Ratios of the total cells before treatment, fraction of survivors and fraction recovered compared to the default values (parameters in table S1). Each parameter has been separately increased or decreased by twenty percent compared to its default value. Results are the mean and standard deviation of three simulations.

## 8. Competition simulations

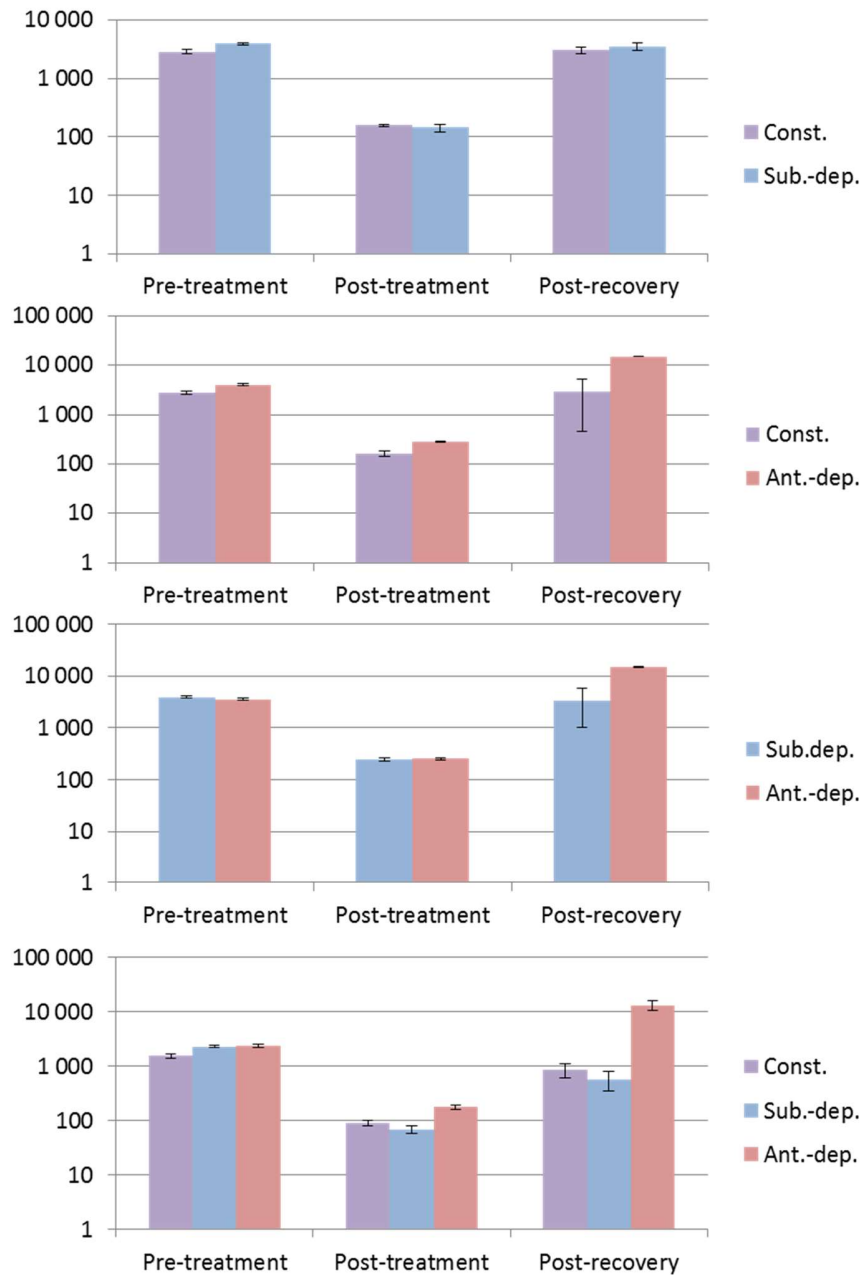

**Figure S 16:** Simulations of competition between strategies. Simulations with two strategies were initialized with five bacteria using each strategy. Simulations with the three strategies were initialized with three bacteria using each strategy. The parameter sets used were  $a_{max}=0.1$  and  $b_{max}=0.1$  for the constant strategy,  $a_{max}=0.1$  and  $b_{max}=0.1$  for the substrate-dependent strategy,  $a_{max}=0.1$  and  $b_{max}=0.1$  for the antibiotic-dependent strategy. Results are the mean and standard deviation of eight simulations with a treatment of two hours.

## 9. References

1. Lardon, L. a. *et al.* iDynoMiCS: Next-generation individual-based modelling of biofilms. *Environ. Microbiol.* **13**, 2416–2434 (2011).
2. Suhaimi, H., Wang, S. & Das, D. B. Glucose diffusivity in cell culture medium. *Chem. Eng. J.* **269**, 323–327 (2015).
3. Carvalho, G., Guilhen, C., Balestrino, D., Forestier, C. & Mathias, J.-D. Relating switching rates between normal and persister cells to substrate and antibiotic concentrations: a mathematical modeling approach supported by experiments. *Microb. Biotechnol.* **0**, 1–12 (2017).
4. Klima, J. & Psenner, R. Determination of Bacterial Cell Dry Mass by Transmission Electron Microscopy and Densitometric Image Analysis Determination of Bacterial Cell Dry Mass by Transmission Electron Microscopy and Densitometric Image Analysis. **64**, 688–694 (1998).
